# Supplementary material
Source: ML conference proceedings conference paper supplement (https://openaccess.thecvf.com/content/WACV2025/html/Chowdhury_Bandit_Based_Attention_WACV_2025_paper.html)
Supplement: Supplementary file 1 [file Chowdhury_Bandit_Based_Attention_WACV_2025_supplemental.pdf]

# Supplementary Material for paper “*Bandit based Attention Mechanism in Vision Transformers*”

## 1. Experimental setting

We report the detailed experimental settings used while pre-training and fine-tuning the models, in Tables 1, 3, and 4. In the setting of self-supervised learning, we have used the same hyperparameters as discussed in the original paper for both DINO [2] and EsViT [8].

Table 1. Summary of training method used to pre-train our proposed approach on Imagenet-1k and fine-tune on three other datasets namely Imagenet-200 [5], CIFAR-10 [7] and CIFAR-100 [7]

| Procedure →                | UCB         | Downstream task |
|----------------------------|-------------|-----------------|
|                            | Pretrain.   | Finetune.       |
| Batch size                 | 256         | 256             |
| Optimizer                  | Adam        | SGD             |
| LR                         | $3.10^{-3}$ | $3.10^{-4}$     |
| LR decay                   | cosine      | cosine          |
| Weight decay               | 0.02        | 0.02            |
| Warmup epochs              | 5           | 5               |
| Label smoothing $\epsilon$ | 0.1         | 0.1             |
| % Dropout                  | 0.1         | 0.1             |
| Stoch. Depth               | ✓           | ✓               |
| Repeated Aug               | ✓           | ✓               |
| Gradient Clip.             | 1.0         | 1.0             |
| H. flip                    | ✓           | ✓               |
| RRC                        | ✓           | ✓               |
| Rand Augment               | ✓           | ✓               |
| LayerScale                 | ✓           | ✓               |
| Mixup alpha                | ✓           | ✓               |
| Cutmix alpha               | 1.0         | 1.0             |
| Erasing prob.              | ✓           | ✓               |
| ColorJitter                | 0.3         | 0.3             |
| Test crop ratio            | 1.0         | 1.0             |
| Loss                       | CE          | CE              |

## 2. Additional Experiments

### 2.1. Image experiments

In the main submission, we have finetuned three datasets Imagenet-200 [5], Cifar-10 [7], and CIFAR-100 [7]. In this supplementary, we report the results of the additional experiments conducted on several other datasets as shown in

Table 3. A detailed description of the dataset along with the Train, Test split is given in Table 2

Table 2. Detailed list of the datasets along with Train-Test size used for finetuning

| Dataset                     | Classes | Train size | Test size |
|-----------------------------|---------|------------|-----------|
| <b>Image Classification</b> |         |            |           |
| Imagenet-200 [5]            | 200     | 1,00,000   | 10,000    |
| CIFAR-10 [7]                | 10      | 50,000     | 10,000    |
| CIFAR-100 [7]               | 100     | 50,000     | 10,000    |
| Describable Textures [3]    | 47      | 3,760      | 1,880     |
| Oxford-IIIT Pets [10]       | 37      | 3,680      | 3,669     |
| Oxford Flowers 102 [9]      | 102     | 2,040      | 6,149     |
| STL10 [4]                   | 10      | 5,000      | 8,000     |
| <b>Audio Classification</b> |         |            |           |
| DCASE19 [6]                 | 10      | 9700       | 4157      |
| ESC-50 [11]                 | 50      | 1600       | 400       |
| FSC22 [1]                   | 27      | 1420       | 606       |

Table 3. Comparison between SOTA models pre-trained models on Imagenet-1k. We finetune these models on various small datasets. With our method, we were able to beat the baseline results. The baseline results were trained using the training techniques in DeiT-III.

| Model name   | Image classificaion      |                       |                        |           |
|--------------|--------------------------|-----------------------|------------------------|-----------|
|              | Describable Textures [3] | Oxford IIIT Pets [10] | Oxford Flowers 102 [9] | STL10 [4] |
| ViT-B-16     | 99.5                     | 99.1                  | 98.6                   | 97.8      |
| ViT-B-32     | 98.1                     | 98.0                  | 96.4                   | 96.7      |
| ViT-L-16     | 99.1                     | 99.0                  | 98.9                   | 97.9      |
| ViT-L-32     | 97.9                     | 98.3                  | 97.3                   | 97.1      |
| ViT-H-14     | 97.7                     | 97.6                  | 96.7                   | 95.6      |
| ViT-B-16-UCB | 99.8                     | 100                   | 100                    | 100       |
| ViT-B-32-UCB | 97.1                     | 97.6                  | 97.8                   | 98.1      |
| ViT-L-16-UCB | 99.2                     | 98.8                  | 99.0                   | 99.1      |
| ViT-L-32-UCB | 97.5                     | 97.2                  | 98.6                   | 98.9      |
| ViT-H-14-UCB | 98.8                     | 99.1                  | 99.3                   | 99.4      |

### 2.2. Audio Experiments

We have also conducted an audio classification experiment on three datasets. We have extracted the audio spectrograms from the audio before feeding them in our model. The results are highlighted in Table 4.

## 3. GPU Memory cost of the proposed approach

We note that our proposed approach utilizes additional GPU memory compared to standard ViTs. To demonstrate

Table 4. Comparison between various approaches for Audio classification

| Model name   | Audio classification |            |             |
|--------------|----------------------|------------|-------------|
|              | FSC22 [1]            | ESC50 [11] | DCASE19 [6] |
| ViT-B-16     | 84.1                 | 81.5       | 85.1        |
| ViT-B-32     | 82.4                 | 80.4       | 82.2        |
| ViT-L-16     | 83.6                 | 81.8       | 83.9        |
| ViT-L-32     | 82.7                 | 81.2       | 83.1        |
| ViT-H-14     | 83.8                 | 82.9       | 84.6        |
| ViT-B-16-UCB | 86.4                 | 83.4       | 86.7        |
| ViT-B-32-UCB | 83.2                 | 82.7       | 83.6        |
| ViT-L-16-UCB | 84.8                 | 83.9       | 86          |
| ViT-L-32-UCB | 83.8                 | 82.9       | 82.9        |
| ViT-H-14-UCB | 85.2                 | 83.7       | 86.6        |

this, we report [Batch size / GPU Memory Usage (MB)]. From Table 5 we see that with increasing batch size we are seeing an increase in GPU memory. The memory cost increases with higher  $p$  values in the  $top - p$  parameter as can be seen in Table 6.

Table 5. GPU memory requirement for different batch size while keeping the  $top - p$  parameter fixed at 5. OOM denotes of out-of-memory problem.

| Batch size       | 32    | 64    | 128   | 256   | 512 |
|------------------|-------|-------|-------|-------|-----|
| GPU Memory Usage | 10867 | 18209 | 32379 | 65301 | OOM |

Table 6. GPU memory requirement for different  $p$  values in the  $top - p$  parameter. The batch size has been fixed at 32

| Top-p            | 1    | 4     | 5     | 6     | 10    |
|------------------|------|-------|-------|-------|-------|
| GPU Memory Usage | 9583 | 10823 | 10967 | 12041 | 13431 |

## References

- [1] Meelan Bandara, Roshinie Jayasundara, Isuru Ariyaratne, Dulani Meedeniya, and Charith Perera. Fsc22 dataset, 2022. 1, 2
- [2] Mathilde Caron, Hugo Touvron, Ishan Misra, Hervé Jégou, Julien Mairal, Piotr Bojanowski, and Armand Joulin. Emerging properties in self-supervised vision transformers. In *Proceedings of the International Conference on Computer Vision (ICCV)*, 2021. 1
- [3] M. Cimpoi, S. Maji, I. Kokkinos, S. Mohamed, , and A. Vedaldi. Describing textures in the wild. In *Proceedings of the IEEE Conf. on Computer Vision and Pattern Recognition (CVPR)*, 2014. 1
- [4] Adam Coates, Andrew Ng, and Honglak Lee. An analysis of single-layer networks in unsupervised feature learning. In *Proceedings of the fourteenth international conference on artificial intelligence and statistics*, pages 215–223. JMLR Workshop and Conference Proceedings, 2011. 1
- [5] Le et al. Imagenet-200. 1
- [6] Le et al. Imagenet-200. 1, 2
- [7] Alex Krizhevsky, Geoffrey Hinton, et al. Learning multiple layers of features from tiny images. 2009. 1
- [8] Chunyuan Li, Jianwei Yang, Pengchuan Zhang, Mei Gao, Bin Xiao, Xiyang Dai, Lu Yuan, and Jianfeng Gao. Efficient self-supervised vision transformers for representation learning. *International Conference on Learning Representations (ICLR)*, 2022. 1
- [9] Maria-Elena Nilsback and Andrew Zisserman. Automated flower classification over a large number of classes. In *2008 Sixth Indian conference on computer vision, graphics & image processing*, pages 722–729. IEEE, 2008. 1
- [10] Omkar M Parkhi, Andrea Vedaldi, Andrew Zisserman, and CV Jawahar. Cats and dogs. In *2012 IEEE conference on computer vision and pattern recognition*, pages 3498–3505. IEEE, 2012. 1
- [11] Karol J Piczak. Esc: Dataset for environmental sound classification. In *Proceedings of the 23rd ACM international conference on Multimedia*, pages 1015–1018, 2015. 1, 2

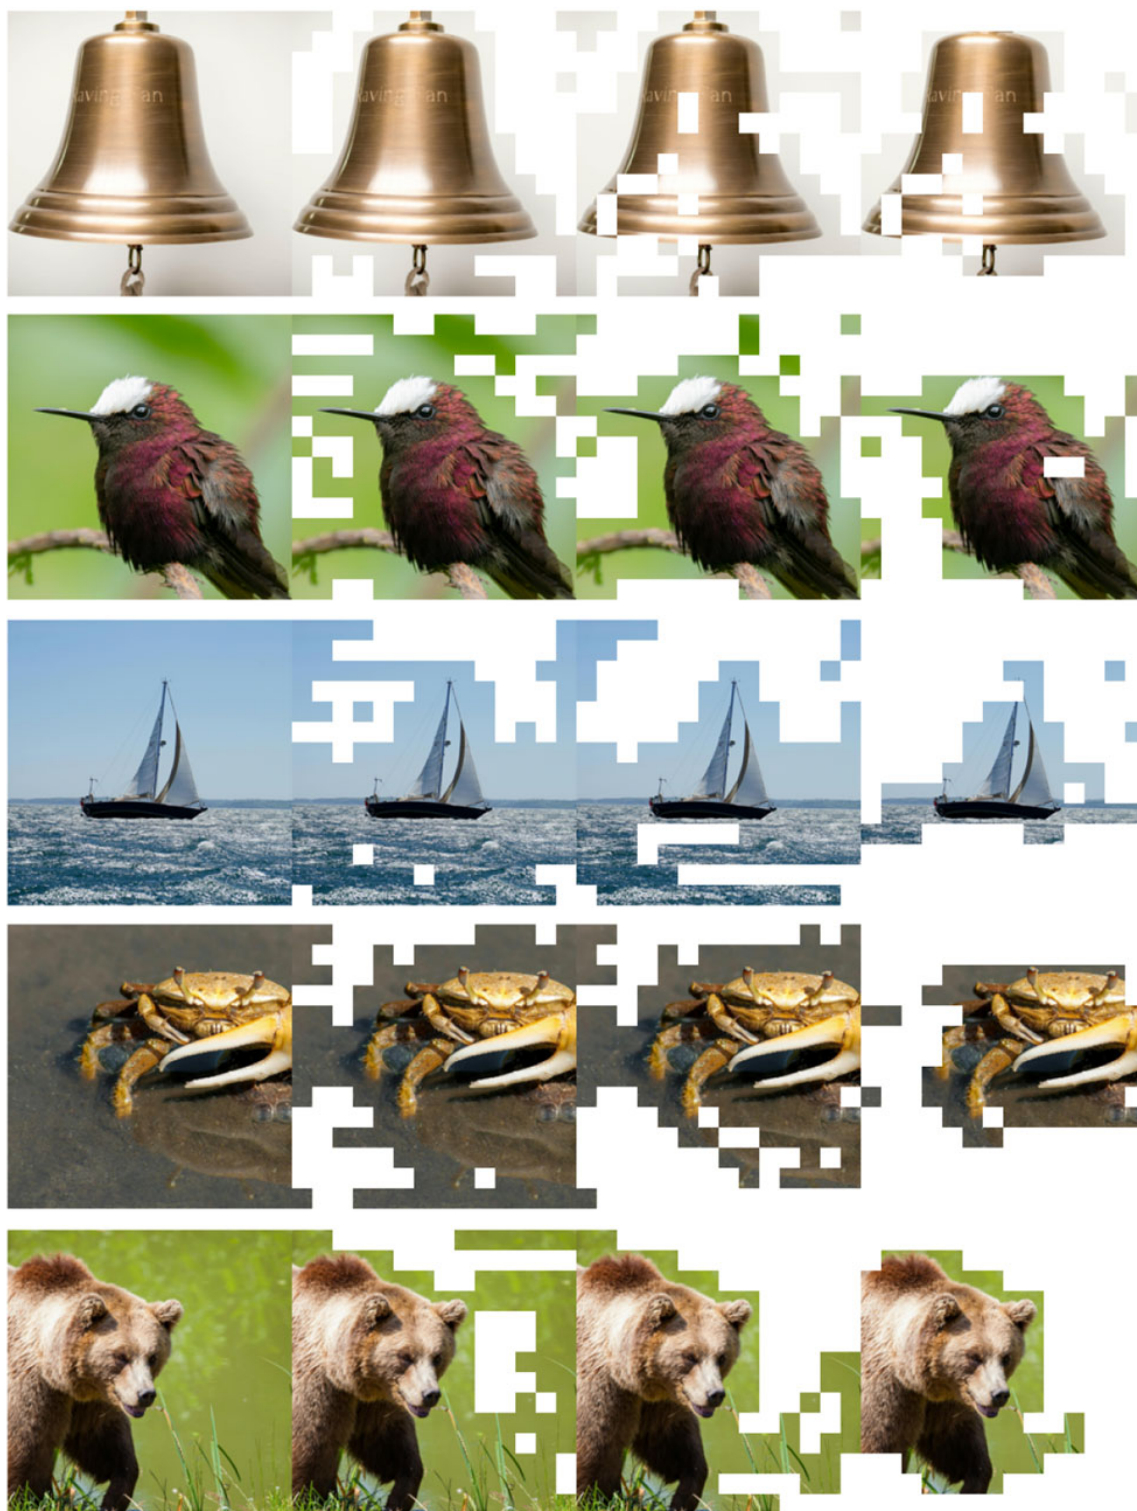

Figure 1. Visualization of Images after dropping redundant patches
